# Supplementary material for: Multi-source data assimilation for physically-based hydrological modeling of an experimental hillslope
Source: Copernicus journal article supplement (doi:10.5194/hess-2018-18), 2018-01-31
Supplement: Supplementary file [file hess-2018-18-RC1-supplement.pdf]

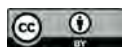

# Multi-source data assimilation for physically-based hydrological modeling of an experimental hillslope

Anna Botto<sup>1</sup>, Enrica Belluco<sup>1</sup>, and Matteo Camporese<sup>1</sup>

<sup>1</sup>Department of Civil, Environmental and Architectural Engineering, University of Padova, Italy

Correspondence to: Anna Botto ([anna.botto@unipd.it](mailto:anna.botto@unipd.it))

## Abstract.

Data assimilation has been recently the focus of much attention for integrated surface-subsurface hydrological models, whereby joint assimilation of water table, soil moisture, and river discharge measurements with the ensemble Kalman filter (EnKF) have been extensively applied. Although the EnKF has been specifically developed to deal with nonlinear models, integrated hydrological models based on the Richards equation still represent a challenge, due to strong nonlinearities that may significantly affect the filter performance. Thus, more studies are needed to investigate the capabilities of the EnKF to correct the system state and identify parameters in cases where the unsaturated zone dynamics are dominant, as well as to quantify possible tradeoffs associated with assimilation of multi-source data. Here, the model CATHY (CATCHment HYdrology) is applied to reproduce the hydrological dynamics observed in an experimental two-layered hillslope, equipped with tensiometers, water content reflectometer probes, and tipping bucket flow gages to monitor the hillslope response to a series of artificial rainfall events. Pressure head, soil moisture, and subsurface outflow are assimilated with the EnKF in a number of scenarios and the challenges and issues arising from the assimilation of multi-source data in this real-world test case are discussed. Our results demonstrate that the EnKF is able to effectively correct states and parameters even in a real application characterized by strong nonlinearities. However, multi-source data assimilation may lead to significant tradeoffs: the assimilation of additional variables can lead to degradation of model predictions for other variables that were otherwise well reproduced. Furthermore, we show that integrated observations such as outflow discharge cannot compensate for the lack of well-distributed data in heterogeneous hillslopes.

## 1 Introduction

Data assimilation, i.e., the process in which observations of a system are merged in a consistent manner with numerical model predictions (e.g., Troch et al., 2003; Moradkhani, 2008), has become increasingly popular in hydrological modeling over the last few decades (Montzka et al., 2012). Among the various techniques available, the ensemble Kalman filter (EnKF) (Evensen, 2003, 2009b) is probably the most widespread, thanks to its ease of implementation, capability to handle nonlinear models and potential to be used as a sequential inverse modeling tool when parameters are included in the update step. Applications in hydrology include studies in different disciplines, such as groundwater hydrology (e.g., Chen and Zhang, 2006; Hendricks Franssen and Kinzelbach, 2008; Bailey and Baù, 2010; Li et al., 2012; Zovi et al., 2017), rainfall-runoff modeling

# Summary of Comments on hess-2018-18.edits.pdf

---

Page: 1

---

 Number: 1    Author: Subject: Inserted Text    Date: 08/03/2018, 11:58:36

---

a

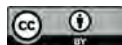

(e.g., Moradkhani et al., 2005; Vrugt et al., 2006; Weerts and El Serafy, 2006; Clark et al., 2008; Xie and Zhang, 2010; Han and Li, 2008), and land surface modeling at multiple scales (e.g., Reichle et al., 2002a, b; Crow and Wood, 2003; Francois et al., 2003; Pan and Wood, 2006; De Lannoy et al., 2007; Cammalleri and Ciruolo, 2012; Flores et al., 2012; Hain et al., 2012).

As a consequence of such popularity, the EnKF is more and more applied also with integrated surface-subsurface hydrological models (IHSSMs), whereby multiple terrestrial compartments (e.g., snow cover, surface water, groundwater) are solved simultaneously, in an attempt to tackle environmental problems in a holistic approach (Maxwell et al., 2014; Kollet et al., 2017). For instance, Camporese et al. (2009a) and Camporese et al. (2009b) combined the CATHY model and the EnKF to assimilate pressure head, soil moisture, and streamflow data, finding that the assimilation of pressure head and soil moisture is beneficial to subsurface states and river discharge, but the assimilation of river discharge alone does not improve the prediction of subsurface states. Similar conclusions were drawn by Pasetto et al. (2012), who compared the EnKF with a modified particle filter to assimilate discharge and pressure head, ~~again with~~ <sup>1</sup> the CATHY model. More recently, Pasetto et al. (2015) used the EnKF and CATHY to investigate the impact of possible sensor failure on the observability of flow dynamics and estimation of the model parameters characterizing the soil properties of an artificial hillslope. Ridler et al. (2014) assimilated soil moisture remote sensing products in the MIKE SHE model and found that surface soil moisture has correction capabilities limited to the first 25 cm of soil. With the same model, Rasmussen et al. (2015a), Rasmussen et al. (2015b), Zhang et al. (2015), and Zhang et al. (2016) investigated in detail issues related to uncertainty quantification and biased observations, as well the impacts of update localization and ensemble size on the multivariate assimilation of groundwater head and river discharge at the catchment scale. Kurtz et al. (2016) first presented a data assimilation framework for the land surface-subsurface part of the Terrestrial System Modelling Platform (TerrSysMP), followed by Baatz et al. (2017), who assimilated distributed river discharge data into the TerrSysMP to estimate the spatially distributed Manning's roughness coefficient, and Zhang et al. (2018), who tested and compared five data assimilation methodologies for assimilating groundwater level data via the EnKF to improve root zone soil moisture estimation. Within yet another modeling framework, Tang et al. (2017) used the EnKF in conjunction with HydroGeoSphere to study the influence of heterogeneous riverbeds on river-aquifer exchange fluxes.

In spite of such a strong interest, several issues related to the use of EnKF for state and parameter estimation in integrated hydrological modeling remain unresolved. The subsurface component of many IHSSMs is based on the solution of the Richards equation in one or three dimensions and although recent ~~studies in synthetic~~ <sup>2</sup> experiments (Erdal et al., 2014; Brandhorst et al., 2017) have shown that the EnKF has great potential for the estimation of soil hydraulic parameters in the unsaturated zone, it is still unclear whether the method is able to cope with nonlinearities and parameter estimation in real test cases, where multiple uncertainties on initial and boundary conditions make the problem much more challenging (e.g., Visser et al., 2006; De Lannoy et al., 2007; Monsivais-Huertero et al., 2010; Shi et al., 2015). Also, as more sources of data become available at cheaper costs <sup>3</sup> it is increasingly difficult to assess which data types are the most suitable or effective to assimilate and <sup>4</sup> **general to assess possible tradeoffs related to multivariate data assimilation.**

Within this context, the main goals of the present study are: i) to assess whether the EnKF in combination with a Richards equation-based hydrological model is able to effectively improve states and parameters in a real-world test case characterized by dominant unsaturated dynamics and ii) to quantify the tradeoffs associated to multi-source data assimilation. To pursue

# Page: 2

---

 Number: 1 Author: Subject: Inserted Text Date: 08/03/2018, 12:59:07  
using

---

 Number: 2 Author: Subject: Inserted Text Date: 08/03/2018, 13:03:44  
numerical

---

 Number: 3 Author: Subject: Cross-Out Date: 08/03/2018, 13:04:17

---

 Number: 4 Author: Subject: Highlight Date: 08/03/2018, 13:06:14  
unclear (please rephrase)

---



these goals, the EnKF is used in combination with the CATHY (CATtachment HYdrology) model (Camporese et al., 2010) to assimilate real observations of pressure head, soil moisture and subsurface outflow collected during a controlled experiment carried out in an artificial hillslope. The experiment is characterized by strong nonlinearities, due to the dominant unsaturated dynamics, but the strictly controlled conditions, as opposed to field studies, allow us to minimize <sup>1</sup> effects of initial and boundary conditions uncertainty <sup>2</sup> ~~the problem at hand~~. The behavior and performance of the EnKF-based assimilation framework in terms of its ability to retrieve the correct hillslope response are evaluated in a number of data assimilation scenarios, characterized by different combinations of assimilated and updated variables.

## 2 The hillslope experiment

The artificial hillslope is placed inside a concrete structure of length 6 m, width 2 m, and height varying linearly from 3.5 m to 0.5 m, corresponding to a slope of 32 degrees. <sup>3</sup> total of fifty apertures, which can be kept closed with screw cups when needed, allow the positioning of various monitoring sensors in properly chosen positions on each lateral wall of the structure. The hillslope toe is made with a hollow-brick porous wall, in order to allow subsurface water to drain. The soil was <sup>4</sup> placed inside the structure to mimic a two-layered hillslope. A uniform 60 cm-thick silty fine sand was deployed on top of a relatively <sup>5</sup> impermeable basement made of sandy clay soil. More details on the soil properties can be found in Lora et al. (2016) and Schenato et al. (2017). In the following, we will refer to the two soil types simply as sand and clay.

Six tensiometers and six water content reflectometer (WCR) probes are used to measure pressure head and water content in the top soil layer. All the sensors are located in an intermediate position of the hillslope, as shown in Figure 1, which reports a plan view and longitudinal cross-section along with the six positions where each tensiometer has been installed in front of the corresponding WCR. Two tipping-bucket flow gages are placed at the toe of the hillslope to measure surface runoff and subsurface outflow, while the rain is generated by a rainfall simulator that can produce relatively uniform rainfall intensities varying from 50 to 150 mm/h (Lora et al., 2016).

A Campbell Scientific (CR 1000) data logger has been used to collect and record all the data with a frequency of 0.5 Hz during a 12-day experiment, <sup>6</sup> ~~which has been~~ carried out by generating rainfall events of different duration alternated with recession periods. Before the experiment, two preliminary tests <sup>7</sup> ~~have been~~ performed to check the intensity and the uniformity of the rainfall rate. The coefficient of uniformity of the preliminary tests resulted equal to 72%, for a mean rate of 58.8 mm/h. Figure 2 reports all the data collected during the experiment. Note that the tensiometers P1 and P4 were affected by malfunctioning, therefore their data are not reported and <sup>8</sup> ~~will not be~~ used in the data assimilation simulations.

## 3 Numerical methods

### 3.1 The CATHY model

The CATHY (CATtachment HYdrology) model (Camporese et al., 2010) is a physics-based hydrological model capable of simulating integrated subsurface, overland and channel water flow. The model combines a Richards equation solver for the

# Page: 3

---

 Number: 1 Author: Subject: Inserted Text Date: 08/03/2018, 13:07:26  
for minimizing

---

 Number: 2 Author: Subject: Cross-Out Date: 08/03/2018, 13:08:20

---

 Number: 3 Author: Subject: Inserted Text Date: 08/03/2018, 14:00:47  
(Figure 1)

---

 Number: 4 Author: Subject: Inserted Text Date: 08/03/2018, 13:11:42  
i

---

 Author: Subject: Sticky Note Date: 08/03/2018, 13:12:41  
i would use the present tense throughout this section

---

 Number: 5 Author: Subject: Inserted Text Date: 08/03/2018, 14:06:21  
low-

---

 Number: 6 Author: Subject: Cross-Out Date: 08/03/2018, 14:08:27

---

 Number: 7 Author: Subject: Inserted Text Date: 08/03/2018, 14:08:44  
were

---

 Number: 8 Author: Subject: Inserted Text Date: 08/03/2018, 14:09:24  
were



## 4 Model and data assimilation setup

### 4.1 CATHY setup

The artificial hillslope is discretized with a surface triangular grid resulting from the subdivision of square cells of 10 cm side. The triangular grid is then replicated vertically for a total of 25 layers to generate the three-dimensional tetrahedral mesh (Figure 3). Fifteen layers are used to represent the top sand, while 10 layers discretize the clay. No flow boundary conditions are assumed at each boundary, except for the subsurface outflow section, where seepage face boundary conditions are used, and the surface, where **1**infall and evaporation rates are imposed. Finally, the soil hydraulic parameters are assigned as reported in Table 1. The values of saturated hydraulic conductivity and van Genuchten retention parameters are perturbed to generate the ensemble of realizations as described in the following section, while **2**oil porosities and specific storages are considered deterministic, **3** the former were **4**all characterized with laboratory tests, while the CATHY model is usually not very sensitive to the latter, **5**

### 4.2 EnKF setup

In order to generate the ensemble of realizations needed for the application of the EnKF, we perturb the atmospheric forcing (i.e., rainfall and evaporation rates), soil properties, and initial conditions. Table 1 reports a summary of the perturbed variables, along with their nominal mean values as well as the nature and statistics of the perturbations. The ensemble of time-variable atmospheric forcing rates was generated with a sequence of multiplicative perturbations,  $\mathbf{q}_k$ , correlated in time as in Evensen (2003),

$$\mathbf{q}_k = \gamma \mathbf{q}_{k-1} + \sqrt{1 - \gamma^2} \mathbf{w}_{k-1}, \quad (14)$$

where the subscript  $k$  is the time index,  $\mathbf{w}_k$  is a sequence of white noise drawn from the standard normal distribution, and the coefficient  $\gamma$  is computed as

$$\gamma = 1 - \frac{\Delta t}{\tau}, \quad (15)$$

$\Delta t$  being the assimilation interval and  $\tau$  the specified time decorrelation length, here set equal to 108,000 s, i.e., 30 h.

The initial conditions consist of a uniform value of pressure head,  $\psi_0$ , whose nominal ensemble mean is -0.67 m, corresponding to a **6**Illy unsaturated soil. The ensemble of  $\psi_0$  values is generated by additive perturbations normally distributed with mean equal to 0 and standard deviation equal to 0.2 m.

Perturbed soil parameters, for both sand and clay, include the saturated hydraulic conductivity as well as the parameters of the van Genuchten retention curves. Table 1 reports the nominal mean values of  $K_s$ , based on soil samples analyzed in the laboratory, as well as the parameters used for generating their ensembles. The saturated hydraulic conductivities of sand and clay are perturbed independently from each other with multiplicative perturbations sampled from a lognormal distribution.

The parameters of the van Genuchten retention curves  $\alpha$ ,  $n$ , and  $\theta_r$  are perturbed taking into account their mutual correlation according to Carsel and Parrish (1988), who described their statistics and transformed them into normally distributed variables

## Page: 6

---

 Number: 1 Author: Subject: Highlight Date: 08/03/2018, 14:31:29

---

Please clarify. Is the model input practically a net precipitation, that is, precipitation minus evaporation?

 Number: 2 Author: Subject: Inserted Text Date: 08/03/2018, 14:32:03

---

whereas

 Number: 3 Author: Subject: Cross-Out Date: 08/03/2018, 14:34:16

---

 Number: 4 Author: Subject: Inserted Text Date: 08/03/2018, 14:34:28

---

being

 Number: 5 Author: Subject: Inserted Text Date: 08/03/2018, 14:37:43

---

and the latter having low impact on the variability of the CATHY model response.

 Number: 6 Author: Subject: Highlight Date: 08/03/2018, 14:45:08

---

Please clarify. What does "fully unsaturated" mean? dry soil ? or soil at residual saturation?

Has this condition been observed/validated before the lab experiment?





via the Johnson system (Johnson, 1970; Bertino et al., 2003). Three main transformation functions are used, i.e. the lognormal (LN), log-ratio (SB), and hyperbolic (SU):

$$LN : Y = \ln(V) \quad (16)$$

$$SB : Y = \ln[(V - A)/(B - V)] = \ln(U) \quad (17)$$

$$5 \quad SU : Y = \sinh^{-1}(U), \quad (18)$$

where  $V$  denotes the parameter before transformation, bounded within the range  $[A \ B]$ , and  $Y$  denotes the transformed parameter with normal distribution. In this work, the prior statistics of the van Genuchten parameters are taken from the soil types “sandy loam” and “silt loam” in Carsel and Parrish (1988), assumed as valid representations of our sand and clay, respectively. The ensemble of transformed parameters is generated by

$$10 \quad \mathbf{y} = \mathbf{u} + \mathbf{T}^T \mathbf{z}, \quad (19)$$

where  $\mathbf{y}$  is the vector containing transformed  $\alpha$ ,  $n$ , and  $\theta_r$ ,  $\mathbf{u}$  contains the transformed variable means, **1** is the factored covariance matrix (see Table 2), and  $\mathbf{z}$  is a vector of normal deviates with mean equal to 0 and standard deviation  $\sigma_{VG}$ . The transformed variables can be included in the matrix  $\mathbf{X}$  when updating the parameters, and can then be back-transformed in order to obtain the updated values of the soil retention parameters.

15 The EnKF algorithm implemented here is actually an ensemble transform Kalman filter (Bishop et al., 2001) that does not require the perturbation of observations. However, the measurement error covariance matrix,  $\mathbf{R}$ , **2** assumed to be known a priori. In this work,  $\mathbf{R}$  was estimated directly from the measurements, taking advantage of the high time resolution of the collected data. Pressure head and water content data were collected every 2 s and averaged every 10 min over a 40 s window to obtain the observations to assimilate. Over the same time window, the data were linearly detrended and **3** the residuals used  
20 to calculate the correlation coefficients between all pairs of observations. The final covariance matrices were then assembled multiplying the correlation coefficients by the relevant standard deviations, assumed as 0.05 m and 0.025 for pressure head and water content, respectively. The subsurface outflow measurements are assumed independent from the pressure head and water content data, with a standard deviation equal to 8% of the measured discharge. When assimilating multiple variables, proper normalization of the measurement error covariance matrices, anomalies of the simulated data, and innovation vectors  
25 were performed, using values of 0.6 m, 0.58, and  $4.17 \times 10^{-5} \text{ m}^3/\text{s}$  for pressure head, water content, and subsurface outflow, respectively.

### 4.3 Data assimilation scenarios

A total of 17 data assimilation scenarios have been simulated, whereby **4** varied the assimilation interval, the assimilated variables, the updated variables, and the uncertainty on the van Genuchten **5** retention parameters. **6** Table 3 reports a summary of the main characteristics for each scenario. Assimilated variables may include water content only or with subsurface outflow, pressure head only or with subsurface outflow, and all three variables together. As regards, **7** the updated variables, three cases have been analyzed: update of the state variables only; update of the state variables and saturated hydraulic conductivities for

# Page: 7

---

 Number: 1 Author: Subject: Highlight Date: 08/03/2018, 15:46:05

I guess T is truly an upper diagonal matrix, obtained from the Choleski factorization of the covariance matrix of the three parameters, alpha, n and theta\_r. Correct? (please explain)

---

 Number: 2 Author: Subject: Highlight Date: 08/03/2018, 15:47:32

this is always the case, isn't it?

---

 Number: 3 Author: Subject: Highlight Date: 09/03/2018, 10:18:00

please revise the sentence

did you mean "..and the residual were used...".?

---

 Number: 4 Author: Subject: Cross-Out Date: 08/03/2018, 15:53:33

---

 Number: 5 Author: Subject: Cross-Out Date: 08/03/2018, 16:04:01

---

 Number: 6 Author: Subject: Inserted Text Date: 08/03/2018, 15:53:50

were varied

---

 Number: 7 Author: Subject: Inserted Text Date: 08/03/2018, 16:06:43

With regard to

---

 Author: Subject: Sticky Note Date: 08/03/2018, 16:06:52

As to

---

 Author: Subject: Sticky Note Date: 08/03/2018, 16:07:29

As



both sand and clay; update of the state variables, hydraulic conductivities and van Genuchten parameters, for both sand and clay. In all the data assimilation scenarios, observations were assimilated only during the first five days of simulation, leaving the final seven days as a validation period, during which the ensemble was let to evolve freely. For comparison, two open loop simulations, i.e., without data assimilation, have also been carried out (Table 3).

5 The performance of the simulations has been evaluated by means of the root mean square error (*RMSE*), computed for the different variables, i.e., pressure head, water content, and subsurface outflow. The root mean square error is calculated as

$$RMSE(t) = \frac{1}{N_o} \sum_{j=1}^{N_o} \sqrt{\frac{1}{N} \sum_{i=1}^N \left( S_{i,j}(t) - O_j(t) \right)^2}, \quad (20)$$

where  $N_o$  is the number of observations available (six, four, and one for water content, pressure head, and subsurface outflow, respectively),  $S_{i,j}$  refers to the simulated results of the  $i$ th realization of the ensemble at the location of the  $j$ th observation and

10  $O_j$  is the corresponding experimental value. To obtain a meaningful comparison between the errors of different variables, we also compute the time-averaged normalized root mean square error, *NRMSE*,

$$NRMSE = \frac{1}{N_T} \sum_{k=1}^{N_T} \frac{RMSE_k}{NF}, \quad (21)$$

where  $N_T$  is the number of time steps,  $k$  is the time index, and  $NF$  is a normalization factor equal to 0.58, 0.60 m, and  $4.17 \times 10^{-5} \text{ m}^3/\text{s}$  (i.e., 2.5 l/min) for the water content, pressure head, and subsurface discharge, respectively. The *NRMSE*

15 is computed separately for each variable and for the assimilation ( $N_T = 120$ ) and validation ( $N_T = 167$ ) periods, but also as a global index of performance averaged over all the variables and the two periods.

## 5 Results and discussion

### 5.1 Preliminary simulations

A preliminary sensitivity analysis over a number of EnKF parameters has been performed, in order to select a final and satisfactory setup for the subsequent data assimilation scenarios. First, simulations with  $N$  equal to 32, 128 and 256 have been performed and it has been found that an ensemble size of 128 ensures a good tradeoff between performance and computational effort.

Then, several dampening factor values ( $\beta$  in equations (7) and (13)) have been tried, including combinations of different values for the update of system state and parameters. Based on this analysis, a value of 1 has been chosen for the update of the system state, whereas a dampening factor equal to 0.5 has been selected for the update of the soil hydraulic parameters ( $K_s$ ,  $\alpha$ ,  $n$ , and  $\theta_r$ , for both sand and clay). This choice of the dampening factors is consistent with previous studies (Brandhorst et al., 2017) and prevents abrupt changes of the retention curve parameters that could lead to difficulties in model convergence and hence loss of realizations.

According to these preliminary analyses, all scenarios reported in Table 3 have been simulated with an ensemble size of 128 and dampening factors of 1 and 0.5 for system state and parameters, respectively.

 Number: 1 Author: Subject: Inserted Text Date: 08/03/2018, 16:12:42  
tested

 Number: 2 Author: Subject: Underline Date: 08/03/2018, 16:33:56

In principle, I have not been convinced by the use of dampening coefficients. They seem very much like fuzzy, empirical ways with which one gets to accept/reject or smooth down results of parameter updating. Can you comment on it? Are you aware of any sort of theoretical basis that justifies their use? What type of considerations does one need to make to understand how to "calibrate" these coefficients?



## 5.2 Overall EnKF performance

Table 4 and Figure 4 summarize the performance of the EnKF in all the data assimilation scenarios, expressed in terms of *NRMSE* for the three measured variables (water content, *WC*, pressure head, *PH*, and subsurface outflow, *Q*), and averaged separately over the assimilation and validation windows. A comparison between scenarios 1-5 and 8-12 in Table 4, characterized by the same assimilated and updated variables but different assimilation intervals, show that assimilating more frequently does not always result in significant improvements of model predictions. The variable that benefits more from more frequent updates is subsurface outflow, especially in the scenarios where *Q* is assimilated (e.g., compare scenarios 3-5 with 10-12).

Figure 4 highlights that most of the data assimilation scenarios result in an improvement of model predictions for pressure head and subsurface outflow, compared to the open loop simulations (data pairs below the 45-degree reference line). However, there are some scenarios which the filter performance in predicting water content is actually worse than in the open loop. From a close inspection of the values in Table 4, it is possible to identify such scenarios as those where pressure head is assimilated, alone or in conjunction with water content and subsurface outflow. This is probably due to a combination of two factors: i) only four out of six tensiometers are available for assimilation, compared to the six WCR probes available for water content, and ii) the pressure head measurements are characterized by relatively poor quality. This can be appreciated from the pressure head data shown in Figure 2, where diurnal disturbances caused by temperature fluctuations (Warrick et al., 1998) are apparent.

## 5.3 Parameter estimation capabilities

To assess the capabilities and benefits of parameter estimation with the EnKF, it is useful to compare scenarios with the same assimilated variables but different updated variables. Figures 5a, 5c, and 5e show the ratios between *RMSE* in data assimilation scenarios S6, S8, S13 and the corresponding open loop values for water content, pressure head, and subsurface outflow, respectively. In these three scenarios, water content alone is assimilated, but the updated variables are system state only in S6, system state and saturated hydraulic conductivity in S8, and system state plus  $K_s$  and  $n$  in Genuchten parameters  $\alpha$ ,  $n$ , and  $\theta_r$  in S13. Figure 5a highlights that progressively updating more parameters brings significant improvements in water content prediction over the validation period, with reductions of the *NRMSE* with respect to the open loop of almost 20% when updating  $K_s$  only and 60% when updating also the retention curve parameters. Moreover, updating parameters improves significantly pressure head predictions in validation and subsurface outflow in both assimilation and validation, as shown in Figures 5c and 5e.

The effect of parameter updating on model predictions for scenarios S6, S8, and S13 can be visualized in Figure 6, which shows ensemble means and 90% confidence bands of simulated water content, pressure head, and subsurface outflow in comparison with the experimental data and the corresponding open loop values. In scenario S6, without parameter update, model predictions during the validation tend to converge again to the open loop simulations both in terms of mean and uncertainty (Figures 6a, 6d, 6g). Updating the parameters (scenarios S8 and S13) results in decreased uncertainty during validation (Figures

# Page: 9

---

 Number: 1 Author: Subject: Inserted Text Date: 08/03/2018, 16:34:39  
the most

---

 Number: 2 Author: Subject: Cross-Out Date: 08/03/2018, 16:35:48

---

 Number: 3 Author: Subject: Inserted Text Date: 08/03/2018, 16:35:42  
in

---

 Number: 4 Author: Subject: Inserted Text Date: 08/03/2018, 16:36:24  
the

---

 Number: 5 Author: Subject: Inserted Text Date: 08/03/2018, 16:36:57  
A

---

 Number: 6 Author: Subject: Inserted Text Date: 08/03/2018, 16:38:08  
indicates that

---

 Number: 7 Author: Subject: Inserted Text Date: 08/03/2018, 16:38:18  
re

---

 Number: 8 Author: Subject: Inserted Text Date: 08/03/2018, 16:38:39  
likely

---

 Number: 9 Author: Subject: Inserted Text Date: 08/03/2018, 16:41:05  
the

---

 Number: 10 Author: Subject: Inserted Text Date: 08/03/2018, 16:40:45  
,

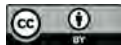

6b, 6c, 6e, 6f, 6h, 6i), due to the reduced variability of saturated hydraulic conductivity and van Genuchten parameters. Note also that the update of  $K_s$  is particularly beneficial to pressure head (panel a versus b and c) and subsurface outflow (panel g versus h and i) whereas updating  $\alpha$ ,  $n$ , and  $\theta_r$  improved significantly the water content (panel e versus f).

#### 5.4 Tradeoffs in multi-source data assimilation

5 We now focus our attention on the scenarios where multi-source data are assimilated. Analogously to the left panels in the same figure, the right panels in Figure 5 show the ratios between  $RMSE$  in data assimilation scenarios S7, S10, S15 and the corresponding open loop values for water content, pressure head, and subsurface outflow. Whereas in scenarios S6, S8, and S13 water content alone was assimilated, scenarios S7, S10, and S15 water content and subsurface outflow were jointly assimilated. The updated variables are system state only in S7, system state and saturated hydraulic conductivity in S10, and system state plus  $K_s$  and van Genuchten parameters  $\alpha$ ,  $n$ , and  $\theta_r$  in S15. As previously noted for the scenarios with assimilation of water content alone, the effect of parameter updating is significant mainly in the validation phase. However, we now observe an increase in validation  $RMSE$  of water content when updating also  $K_s$ , with a value that exceeds the one of the corresponding open loop. At the same time, there is a decrease in pressure head  $RMSE$  of more than 40% with respect to the open loop, indicating that the update of  $K_s$  is beneficial to pressure head, but not to water content. Including the update of van Genuchten parameters, in scenario S15, has an opposite effect: model predictions of water content in validation improve dramatically ( $RMSE$  of almost 60% less than in the open loop) while pressure head predictions worsen slightly and align with  $RMSE$  values of scenario S13. This indicates that the update of the van Genuchten parameters is more important for predictions of water content than pressure head and presents an interesting example of the tradeoff associated with multi-source data assimilation and parameter updating in integrated hydrological models.

Further insights about the differences between scenarios S10 and S15 can be gained by looking at Figures 7 and 8, which report the prior and posterior (i.e., at the end of the assimilation period) distributions of soil parameters. Figure 7 reports the results for scenario S10, where  $K_s$  only was updated, and shows that the sand  $K_s$  is clearly identifiable, whereas the clay  $K_s$  is not, with a large residual uncertainty and a mean value that is not consistent with the actual soil type in the hillslope. As no data are available in the clay layer, the large residual variability should be expected, but the bias in the mean value is probably caused by various correlations and is likely the reason for the poor model prediction of water content.

Figure 8 shows the prior and posterior distributions of  $K_s$ ,  $\alpha$ ,  $n$ , and  $\theta_r$  in S15. Again, for the sand, the saturated hydraulic conductivity can be clearly identified, as well as the exponent  $n$  of the van Genuchten retention function, while parameters  $\theta_r$  and  $\alpha$  are more difficult to estimate. As for the clay, posterior uncertainty is large for all the parameters and the mean value of  $K_s$  shows again a bias with respect to the prior value, although in this case the final value is more consistent with the actual soil type and this could explain why the water content model predictions improve significantly compared to scenario S10. The results of parameter updating for the clay point out once more that data are needed in all the soil layers and an integrated measurement such as the subsurface outflow is not sufficient to compensate for this lack of representativeness.

Lastly, we analyze the tradeoffs in system state predictions associated to multi-source data assimilation for scenarios S15, S16, and S17. Figure 9 shows pressure head in P2, water content in W6, and subsurface outflow as simulated in the data

# Page: 10

---

 Number: 1 Author: Subject: Inserted Text Date: 08/03/2018, 16:44:06  
T

---

 Number: 2 Author: Subject: Inserted Text Date: 08/03/2018, 16:46:05  
(left panels in Figure 5)

---

 Number: 3 Author: Subject: Inserted Text Date: 08/03/2018, 16:46:30  
(right panels in Figure 5)

---

 Number: 4 Author: Subject: Inserted Text Date: 08/03/2018, 16:48:54  
one

---

 Number: 5 Author: Subject: Cross-Out Date: 08/03/2018, 16:49:46

---

 Number: 6 Author: Subject: Inserted Text Date: 08/03/2018, 16:50:19  
, whereas

---

 Number: 7 Author: Subject: Cross-Out Date: 08/03/2018, 16:51:21

---

 Number: 8 Author: Subject: Inserted Text Date: 08/03/2018, 16:51:06  
, which

---

 Number: 9 Author: Subject: Inserted Text Date: 08/03/2018, 16:51:44  
on

---

 Number: 10 Author: Subject: Inserted Text Date: 08/03/2018, 16:52:02  
from

---

 Number: 11 Author: Subject: Highlight Date: 08/03/2018, 16:54:49  
and -perhaps- also by the low sensitivity of the assimilated variables to the clay permeability
